# Supplementary material for: Novel Assessment of Viscoelastic Skeletal Muscle Properties in Chronic Kidney Disease: Association with Physical Functioning
Source: MDPI journal article supplement (doi:10.3390/physiologia3030032), 2023-09-14
Supplement: s1 [file s1]

Archive with 1 entries (1 files):
- physiologia-2573995-supplementary.pdf
