# Supplementary material for: Novel Assessment of Viscoelastic Skeletal Muscle Properties in Chronic Kidney Disease: Association with Physical Functioning
Source: MDPI journal article supplement (doi:10.3390/physiologia3030032), 2023-09-14
Supplement: s1 [file s1 › physiologia-2573995-supplementary.pdf]

**Supplementary Material 1. Differences and reliability between repeated measures on left and right sides**

|                                                                                                                                                                                                                                                                                                         | Test 1       | Test 2       | Difference (95CI)  | P    | ICC              |
|---------------------------------------------------------------------------------------------------------------------------------------------------------------------------------------------------------------------------------------------------------------------------------------------------------|--------------|--------------|--------------------|------|------------------|
|                                                                                                                                                                                                                                                                                                         | Mean (SD)    | Mean (SD)    |                    |      |                  |
| Right (n=50)                                                                                                                                                                                                                                                                                            |              |              |                    |      |                  |
| Muscle tone, Hz                                                                                                                                                                                                                                                                                         | 12.4 (1.9)   | 12.4 (1.9)   | 0.1 (-0.1 to 0.3)  | .476 | .929 (excellent) |
| Muscle stiffness, Nm                                                                                                                                                                                                                                                                                    | 238.0 (35.2) | 237.4 (38.3) | 0.6 (-2.9 to 4.0)  | .738 | .945 (excellent) |
| Muscle elasticity, log                                                                                                                                                                                                                                                                                  | 4.6 (18.8)   | 4.8 (22.1)   | -0.2 (-1.3 to 0.9) | .668 | .982 (excellent) |
| Left (n=39)                                                                                                                                                                                                                                                                                             |              |              |                    |      |                  |
| Muscle tone, Hz                                                                                                                                                                                                                                                                                         | 12.7 (2.0)   | 12.7 (2.0)   | -0.0 (-0.3 to 0.3) | .922 | .884 (good)      |
| Muscle stiffness, Nm                                                                                                                                                                                                                                                                                    | 253.4 (36.2) | 254.2 (37.2) | -0.8 (-5.7 to 4.0) | .728 | .916 (excellent) |
| Muscle elasticity, log                                                                                                                                                                                                                                                                                  | 1.8 (0.3)    | 1.8 (0.3)    | -0.0 (-0.7 to 0.1) | .807 | .826 (good)      |
| Data shown as mean and standard deviation (SD). 95% confidence intervals (95CI) are shown for difference. ICC = Intraclass correlation coefficient (two-way mixed single measures), between .750 and .900 was defined as ‘good’; above .900 was defined as ‘excellent’. Significance recognised P<.050. |              |              |                    |      |                  |
